# Supplementary material
Source: PubMed Central journal article supplement (PMC10240728)
Supplement: EIJ-D-22-00718_Seguchi_SD.pdf [file EIJ-D-22-00718_Seguchi_SD.pdf]

## Supplementary data

### Supplementary Appendix 1. Inhomogeneity index of degradation per strut cross-section (InI<sub>D</sub>).

The inhomogeneity index of degradation per strut cross-section (InI<sub>D</sub>) was defined as a quantitative unitless measure based on the planimetry data that is sensitive to the shape of the undegraded area  $A_{undeg}$  within the initial area  $A_{ini}$  of an individual strut cross-section, while being independent of the degradation degree and of the aspect ratio of the strut cross-section side lengths which can vary by strut design and by cutting angle. Ideally, uniform shapes of  $A_{undeg}$  with equal degraded layer thickness at all four sides result in  $InI_D = 1$ , whereas non-uniform shapes of  $A_{undeg}$  with a minimal width or height within the shape result in  $InI_D > 1$  (**Supplementary Figure 2**). Certain irregular shapes of  $A_{undeg}$  (e.g. trapezoidal) can lead to  $InI_D < 1$ . Since the frequency of such strut-cross sections could differ between scaffold type groups, strut cross-sections with  $InI_D < 0.85$  are excluded from evaluation to avoid unequal effects on the group mean values of  $InI_D$ , while still allowing a certain scattering around 1.00.

The formula used to determine the inhomogeneity index of each strut is

$$InI_D = \frac{100\% - \text{'minimum degree of undegraded distance'}^2}{\text{'degradation degree of strut cross-section normalized to square-shaped } A_{ini} \text{'}}$$
$$InI_D = \frac{100\% - \left(\frac{D_{min,undeg}}{D_{ini}}\right)^2}{100\% - \frac{A_{undeg} + 0.5(\Delta_r^2 - \Delta_r \sqrt{\Delta_r^2 + 4A_{undeg}})}{(r A_{ini})}}$$

With the following measures taken from planimetry (Supplemental figure2)

$\Delta_r$  = side length difference (long – short) from measured strut cross-section

$r$  = side aspect ratio (short/long) from measured strut cross-section

$D_{min,undeg}$  = minimal width or height (approx. parallel to sides of  $A_{ini}$ ) within  $A_{undeg}$  through the mass center of  $A_{undeg}$

$D_{ini}$  = diameter of initial strut cross-section (without coating) in the main direction of

$D_{min,undeg}$  (parallel to strut thickness or width)

The independence of the degradation degree was realized by squaring the minimum degree of undegraded distance. Thus, a non-uniform shape of  $A_{\text{undeg}}$  with smaller scale, thus having a higher degradation degree, results in the same  $\text{InI}_D$  value as the bigger scaled  $A_{\text{undeg}}$  with same shape and lower degradation degree. The independence of the aspect ratio  $r$  was realized by normalization of degradation degree to square-shaped  $A_{\text{ini}}$  (replacement of  $A_{\text{undeg}}/A_{\text{ini}}$  by fraction including the rescaling terms with  $\Delta_r$  and  $r$ ).

**Supplementary Table 1. Comparison of scaffold design and features.**

|                                     | DREAMS 3G                                                                                                                                                                       | Magmaris™ scaffold                                                 |
|-------------------------------------|---------------------------------------------------------------------------------------------------------------------------------------------------------------------------------|--------------------------------------------------------------------|
| Backbone alloy                      | BIOMag™ alloy: 93.75 wt% magnesium plus 6.25 wt% aluminum                                                                                                                       | WE43 based alloy: 93 wt% magnesium plus 7 wt% rare earth elements* |
| Coated polymer and the eluting drug | BIOlute™ coating: drug-eluting coating on the scaffold is composed of a bioresorbable poly-L-lactic acid (PLLA) polymer matrix loaded with sirolimus (140 µg/cm <sup>2</sup> ). |                                                                    |
| Scaffold geometry                   | Six-crown and two-link design                                                                                                                                                   |                                                                    |
| Strut thickness                     | 99 / 117 /147 µm                                                                                                                                                                | 150 µm                                                             |
| Crossing profile                    | 1.3 mm (for 2.5 - 3.5 mm size)<br>1.4 mm (for 4.0 mm size)                                                                                                                      | 1.5 mm                                                             |

\* from reference <sup>11</sup>

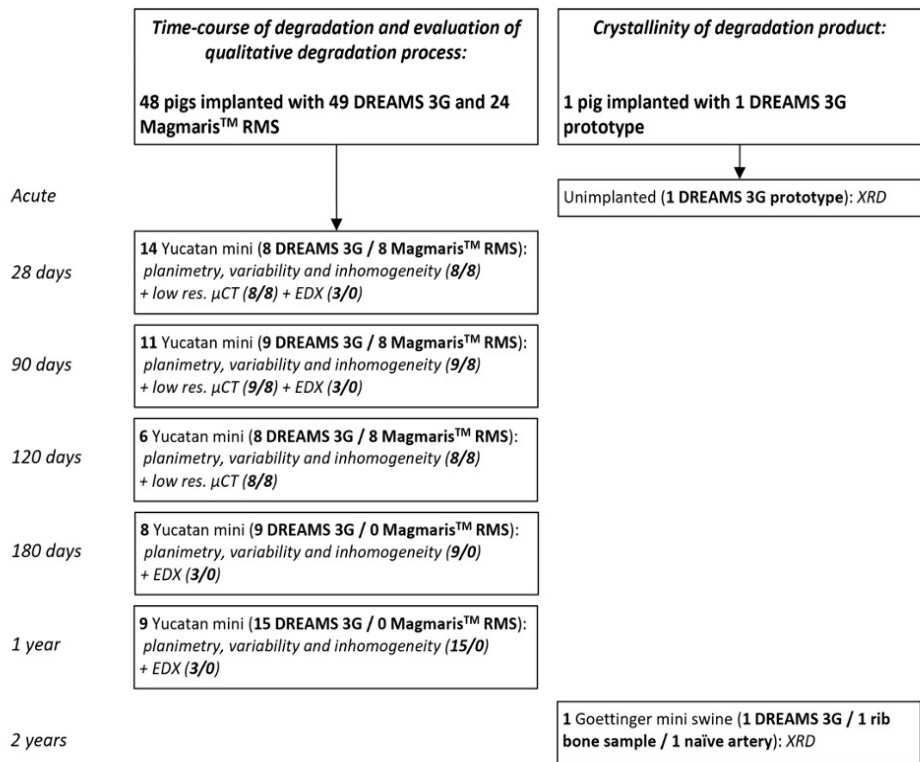

**Supplementary Figure 1.** Study flowchart.

Number of animals, total devices per group and devices assigned to specific analysis methods.

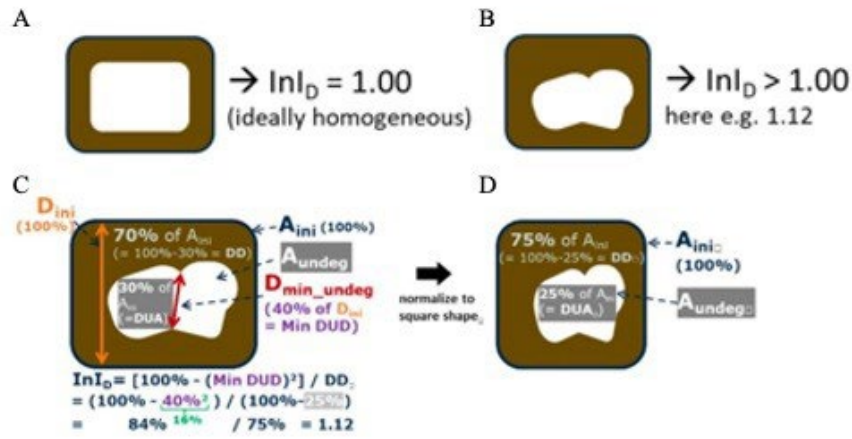

**Supplementary Figure 2.** Illustration of inhomogeneity index determination.

(A) Schematical illustration of ideal homogenous degrading strut cross-section with  $\text{InID}=1.00$  and (B) an example of more inhomogeneous degrading strut cross-section with  $\text{InID}=1.12$ .

(C, D) Schematic illustration of inhomogeneous degrading strut cross-section including the measures extracted from partial areas  $A_{undeg}$  and  $A_{ini}$  that were used in the formula for the inhomogeneity index, in this example leading to  $\text{InID}=1.12$ .

Used abbreviations (besides the ones defined in the text): DD = degradation degree; DUA = degree of undegraded area; Min DUD = Minimum degree of undegraded distance;  $\text{DD}\square$  and  $\text{DUA}\square$  = same meanings, but after normalization to square-shaped strut cross-section.

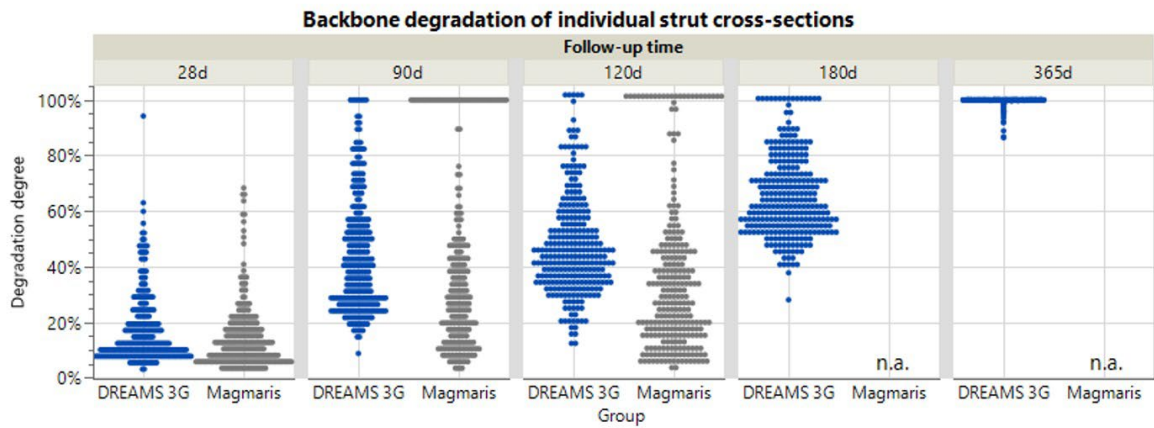

**Supplementary Figure 3.** Scatter plot of backbone degradation of individual strut cross-sections per follow-up timepoint and device group determined by optical microscopy planimetry as visualisation of the variability per strut cross-section.

n.a.: not available
